# Supplementary material for: A simple and efficient transfer method for fabricating stretchable AgNW patterns on PDMS using carboxylated cellulose nanofibers as a sacrificial layer
Source: Royal Society of Chemistry journal article supplement (doi:10.1039/d3nr01029e), 2023-01-01
Supplement: d3nr01029e1.pdf [file d3nr01029e1.pdf]

## Supporting Information

A simple and efficient transfer method for fabricating stretchable AgNW patterns on PDMS using carboxylated cellulose nanofiber as a sacrificial layer

Jianzhong Wang,<sup>a</sup> Kaiqing Wang,<sup>a</sup> and Fei Xiao<sup>\*a</sup>

a. Department of Materials Science, Fudan University, 2005 Songhu Road, Shanghai 200438, People's Republic of China.

\*Corresponding author, feixiao@fudan.edu.cn

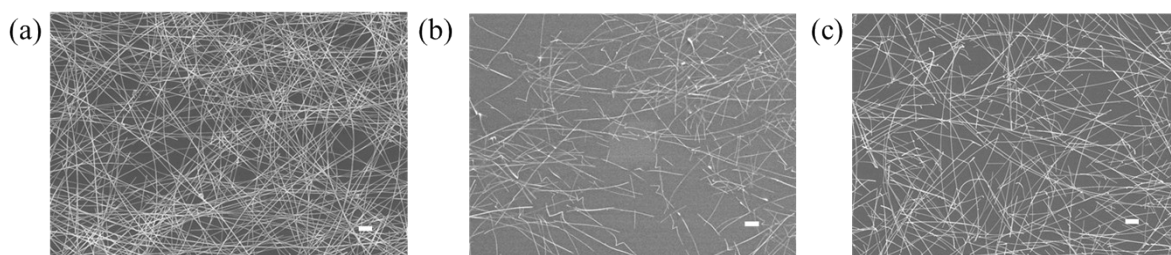

Fig. S1 (a-c) SEM images of the AgNW network (a) direct coated on glass, (b) transferred to PDMS substrate by curing and peeling-off process, (c) remained on glass after PDMS transfer. The bar is 1  $\mu\text{m}$ .

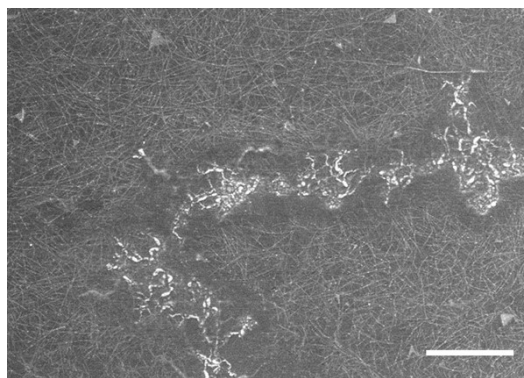

Fig. S2 SEM images of the AgNW network failure area after electric test. The bar is 10  $\mu\text{m}$ .

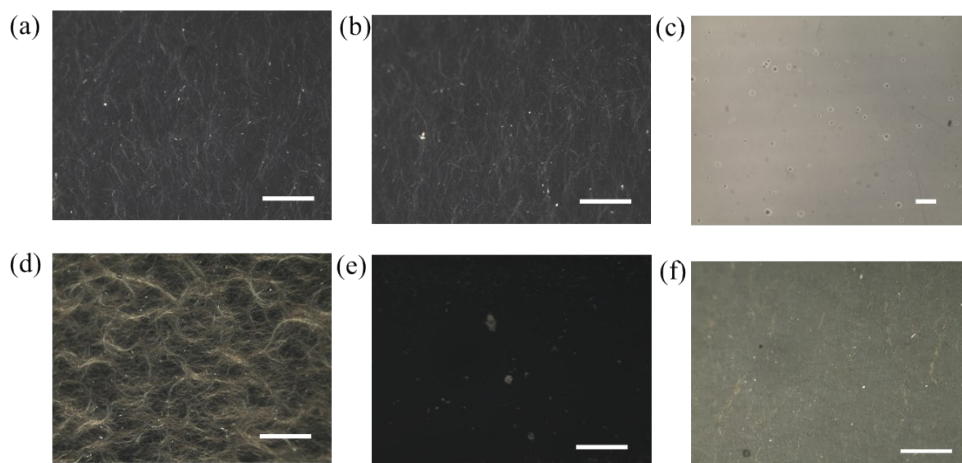

Fig. S3 Optical microscope images of (a) AgNW/WA/PDMS before 10 cycles tape adhesion test, (b) AgNW/WA/PDMS after 10 cycles tape adhesion test, (c) 3M tape after 10 cycles adhesion test of AgNW/WA/PDMS, (d) direct-coating prepared AgNW/PDMS before adhesion test, (e) direct-coating prepared AgNW/PDMS after 1 cycle tape adhesion test, (f) 3M tape after 1 cycle adhesion test of direct-coating prepared AgNW/PDMS. The bar in (a-b, d-f) and (c) are 50  $\mu\text{m}$  and 100  $\mu\text{m}$  respectively.
